# Supplementary material for: Untrusted Hardware Causes Double-Fetch Problems in the I/O Memory
Source: Springer Nature journal article supplement (doi:10.1007/s11390-018-1842-3), 2018-05-01
Supplement: 11390_2018_1842_MOESM1_ESM.pdf [file 11390_2018_1842_MOESM1_ESM.pdf]

# Untrusted Hardware Causes Double-fetch Problems in the I/O Memory

---

Kai Lu, Pengfei Wang, Gen Li, Xu Zhou

Lu K, Wang PF, Li G et al. Untrusted hardware causes double-fetch problems in the I/O memory. JOURNAL OF COMPUTER SCIENCE AND TECHNOLOGY 33(3): 587–602 May 2018. DOI 10.1007/s11390-018-1842-3

# Motivation

- USB autoplay attack
- BadUSB (Blackhat 2014)
  - performed attacks by writing malicious code onto USB control chips
  - brought the risks from what the devices carry to the core of how they work
  - The underlying issue is the inability to guarantee and verify the functionality and integrity of the connected devices.

# Hardware Double Fetch

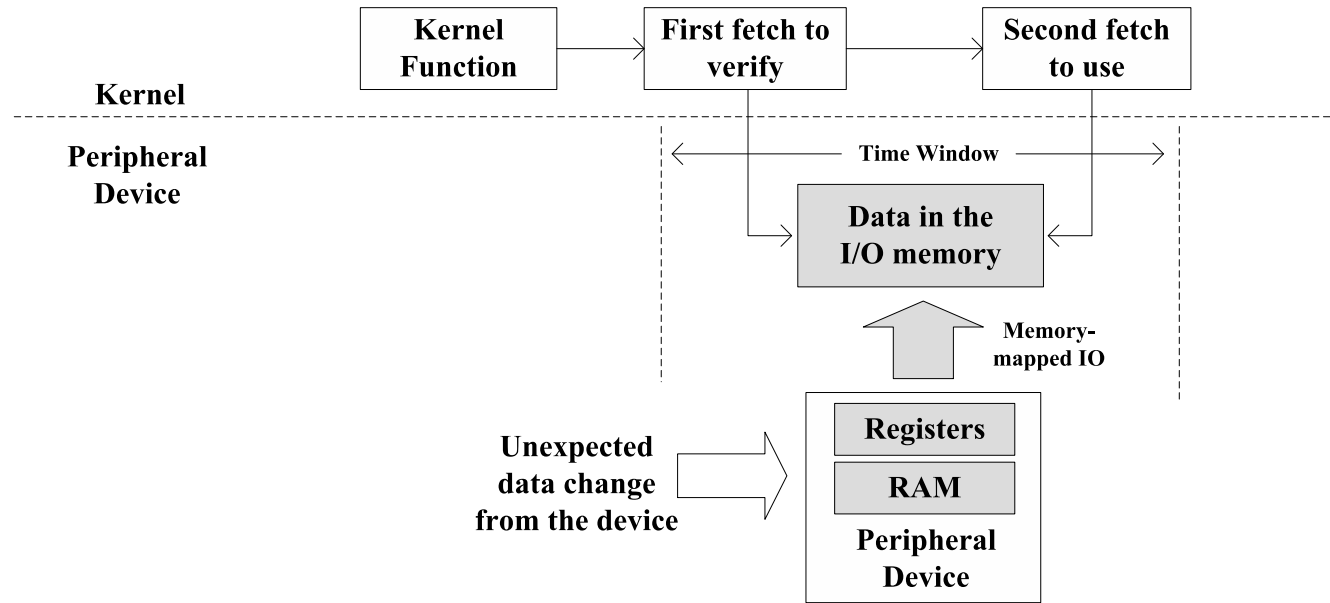

**Figure 1:** Illustration of How A Hardware Double Fetch Happens

- Operating systems control peripheral devices by reading from and writing to the device registers via memory-mapped I/O.
- Compromised hardware could flip the data between two reads of the “same” I/O memory data.

# Static Pattern-matching Approach

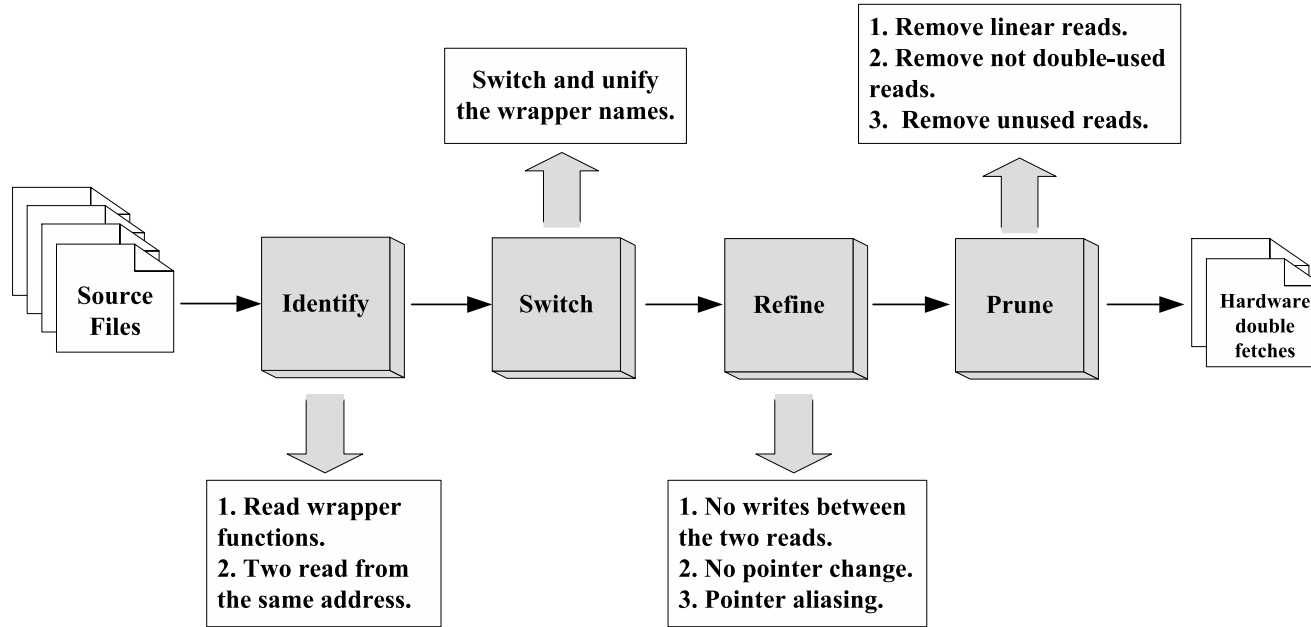

**Figure 2:** Overview of the Static Pattern-Matching Approach

- Could analyze the complete kernel (including all drivers) without relying on the corresponding hardware
- Open sourced: [https://github.com/wpengfei/hardware\\_df](https://github.com/wpengfei/hardware_df)

# Results

**Table 1: Identified Hardware Double Fetches Results**

| Types          | Categories      | Occurrences<br>&Percentage | True<br>Bugs |
|----------------|-----------------|----------------------------|--------------|
| Status Regs    | Common Check    | 59 (16.3%)                 | 0            |
|                | Loop Check      | 80 (22.2%)                 | 0            |
|                | Wait Check      | 81 (22.4%)                 | 0            |
|                | Stable Check    | 18 (5.0%)                  | 0            |
| Configure Regs | Configure Check | 29 (8.0%)                  | 0            |
| Data Regs      | Check and Use   | 68 (18.8%)                 | 3            |
| Device Mem     | Block Check     | 1 (0.3%)                   | 1            |
|                | Flush Write     | 17 (4.7%)                  | 0            |
| Special        | Double Valid    | 6 (1.7%)                   | 0            |
|                | Delay           | 2 (0.6%)                   | 0            |
| Total          | –               | 361 (100%)                 | 4            |

- Confirmed vulnerabilities:
  - CVE-2017-8831、 CVE-2017-9984
  - CVE-2017-9985、 CVE-2017-9986

- Applied to Linux kernel-4.10.1
- took approximately 28 minutes
- got 361 occurrences of hardware double fetches from 178 candidate files out of 42,417 source files (.c or .h files) of the entire Linux kernel.
